# Supplementary material
Source: publisher site journal article supplement (https://www.dovepress.com/article/326814)
Supplement: Supplementary file 1 [file get_supplementary_file.php]

**Supplementary Figure 1**


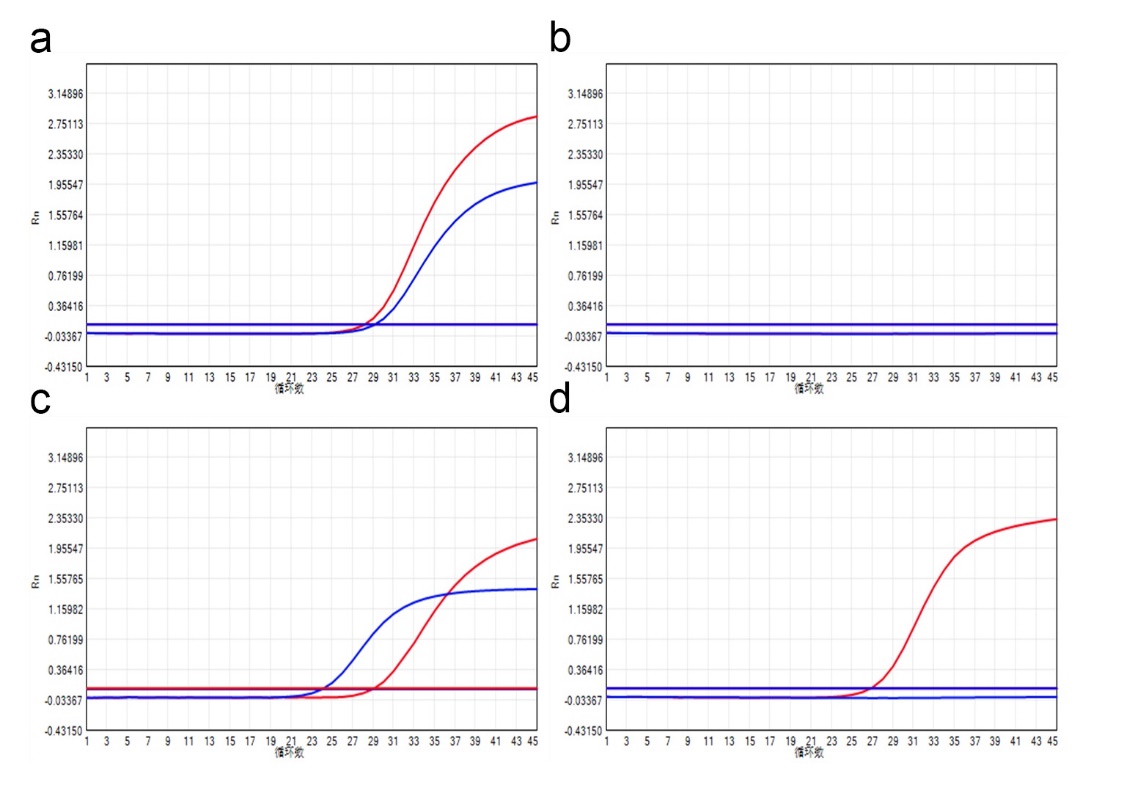


B

A

D

C

**Cycle number**

**Cycle number**

**Cycle number**

**Cycle number**

**Supplementary Figure 1.**  **Representative amplification curves of multiplex real time PCR in this study.** (A) positive control of *P. jirovecii*: Ct ≤ 40 at channel FAM and CY5 (internal control); (B) negative control of *P. jirovecii*: no Ct or Ct > 40 at channel FAM and CY5 (internal control); (C) positive sample of *P. jirovecii*; (D) negative sample of *P. jirovecii*. Blue: *P. jirovecii* in FAM channel; red: internal control in CY5 channel.
